# Supplementary material for: Tolerance and antioxidant response to heavy metals are differentially activated in Trichoderma asperellum and Trichoderma longibrachiatum
Source: PeerJ. 2025 Feb 24;13:e19016. doi: 10.7717/peerj.19016 (PMC11867043; doi:10.7717/peerj.19016)
Supplement: Supplemental Information 1 [file peerj-13-19016-s001.xlsx]

## Sheet: Raw data Zapata-Sarmiento et al
	Dry biomass											Malondialdehyde (MDA) content
	Trichoderma asperellum					Trichoderma longibrachiatum						Trichoderma asperellum										Trichoderma longibrachiatum
	Growth (dry biomass) g L-1					Growth (dry biomass) g L-1						Lipid peroxidation 72 h (nmol MDA g-1 FW)					Lipid peroxidation 144 h (nmol MDA g-1 FW)					Lipid peroxidation 72 h (nmol MDA g-1 FW)					Lipid peroxidation 144 h (nmol MDA g-1 FW)
	Control	Cu	Cr	Pb		Control	Cu	Cr	Pb			Control	Cu	Cr	Pb		Control	Cu	Cr	Pb		Control	Cu	Cr	Pb		Control	Cu	Cr	Pb
1	4.972	4.546	4.03	3.096		5.9	6.22	6.82	5.06		1	100.952	372.381	296.19	296.19		410.476	820	572.381	1100.95		115.238	467.619	210.476	520		424.762	1262.86	610.476	667.619
2	4.624	4.904	4.192	2.826		6.1	6.24	6.88	5		2	91.4286	377.143	305.714	305.714		491.429	734.286	567.619	1034.29		120	581.905	243.81	562.857		400.952	1200.95	577.143	581.905
3	5.774	4.96	4.152	3.092		6.02	6.08	6.78	4.8		3	91.4286	358.095	291.429	300.952		420	710.476	672.381	1024.76		143.81	496.19	229.524	510.476		439.048	1256.14	639.048	562.857
4	4.866	4.34	4.212	3.148		6.1	6.02	6.88	4.84		4	100.952	358.095	305.714	296.19		434.286	767.619	653.333	996.191		120	581.905	243.81	562.857		458.095	1220	639.048	534.286
	Conidia											Peroxidase activity
	Trichoderma asperellum					Trichoderma longibrachiatum						Trichoderma asperellum										Trichoderma longibrachiatum
	Sporulation (conidia g DW-1 )					Sporulation (conidia g DW-1 )						Peroxidase activity 72 h (U mg-1 protein)					Peroxidase activity 144 h (U mg-1 protein)					Peroxidase activity 72 h (U mg-1 protein)					Peroxidase activity 144 h (U mg-1 protein)
	Control	Cu	Cr	Pb		Control	Cu	Cr	Pb			Control	Cu	Cr	Pb		Control	Cu	Cr	Pb		Control	Cu	Cr	Pb		Control	Cu	Cr	Pb
1	3.92478e+08	1.92732e+08	5.1665e+06	3.58398e+06		6.2069e+06	3.79747e+06	3.17919e+06	2.71318e+06		1	0.11185	0.198153	0.205672	0.520574		1.15669	2.9488	0.560141	1.48611		0.278006	0.239279	0.329233	0.174381		1.21208	3.00042	0.267809	1.19163
2	4.02249e+08	1.99641e+08	5.11069e+06	3.954e+06		4687500	3.52564e+06	2.94985e+06	3.07692e+06		2	0.118997	0.186437	0.202517	0.578123		1.50805	2.47792	0.722156	1.56562		0.247479	0.221981	0.313131	0.172438		1.55857	2.42406	0.241155	1.25718
3	3.94091e+08	1.97339e+08	5.25356e+06	3.92781e+06		5.49828e+06	4.27632e+06	3.29341e+06	4.25532e+06		3	0.155875	0.203178	0.20898	0.534091		1.55073	2.57799	0.436332	1.27635		0.242208	0.235491	0.29411	0.161123		1.26818	2.00142	0.259762	2.18284
4	3.91693e+08	1.98618e+08	5.1735e+06	3.77662e+06		5.57377e+06	4.05405e+06	2.86533e+06	3.44828e+06		4	0.125978	0.189534	0.206518	0.539563		1.42776	2.29161	0.539732	1.19885		0.267656	0.238981	0.309095	0.168653		1.88584	2.97964	0.394534	2.16421
	Tolerance index											Catalase activity
	Trichoderma asperellum					Trichoderma longibrachiatum						Trichoderma asperellum										Trichoderma longibrachiatum
	Tolerance index					Tolerance index						Catalase activity 72 h (U mg-1 protein)					Catalase activity 144 h (U mg-1 protein)					Catalase activity 72 h (U mg-1 protein)					Catalase activity 144 h (U mg-1 protein)
		Cu	Cr	Pb			Cu	Cr	Pb			Control	Cu	Cr	Pb		Control	Cu	Cr	Pb		Control	Cu	Cr	Pb		Control	Cu	Cr	Pb
1		0.8985	0.7966	0.6119			1.048	1.147	0.8557		1	6275.86	7754.26	3605.81	10946.8		4717.36	10157	3518	1363.12		2824.46	748.802	2919.2	5661.74		1648.7	7453.64	3319	4822.4
2		0.9693	0.8286	0.5586			1.034	1.124	0.8623		2	6577.93	7852.09	3636.19	12342.9		5929.59	9044.4	3820.04	1623.28		2425.3	694.669	2407.68	6421.6		1295.56	6121.91	4009.21	4761.45
3		0.9804	0.8307	0.6111			1.008	1.107	0.7794		3	6125.16	7846.98	3474.3	10655.1		4066.85	6516.94	3229.21	1302.09		2510.77	783.006	2216.61	5750.2		1322.89	6207.56	3541.2	6018.98
4		0.8578	0.8325	0.6222			0.9817	1.157	0.7694		4	6295.86	7834.26	3584.3	11316.9		4809.77	9729.65	3230.29	1152.63		2350.17	739.558	2516.51	5961.54		1189.22	6898.42	4984.94	5693.01

## Sheet: Raw qPCR data Zapata-Sarmiento
72 h								144 h								72h								144 h								72H								144 h
Trichoderma longibrachiatum								Trichoderma longibrachiatum								Trichoderma longibrachiatum								Trichoderma longibrachiatum								Trichoderma longibrachiatum								Trichoderma longibrachiatum
Tub	GPX	delta Ct	Fold		Normalized expression level			Tub	GPX	delta Ct	Fold		Normalized expression level			Tub	Cys	delta Ct	Fold		Normalized expression level			Tub	Cys	delta Ct	Fold		Normalized expression level			Tub	CAT	delta Ct	Fold					Tub	CAT	delta Ct	Fold
TL-Control								TL-Control								TL-Control								TL-Control								TL-Control					Normalized			TL-Control					Normalized expression level
23.9929	8.65398	-15.3389	41445.7	41015.5	1.01049			27.4079	9.44357	-17.9643	255737	262081	0.975793			23.9929	14.9633	-9.0296	522.615	541.205	0.965651			27.4079	17.4811	-9.92677	973.318	703.999	1.38256			23.9929	31.8815	7.8886	0.00421984	0.00359075	1.1752			27.4079	32.9011	5.49325	0.0222008	0.0218964	1.0139
23.9929	8.67178	-15.3211	40937.2		0.998092			27.4079	9.38623	-18.0216	266107		1.01536			23.9929	14.8012	-9.19171	584.763		1.08048			27.4079	18.1054	-9.30243	631.41		0.896891			23.9929	32.3962	8.40333	0.00295355		0.822544			27.4079	32.8692	5.46134	0.0226972		1.03657
23.9929	8.68146	-15.3114	40663.5		0.991419			27.4079	9.39552	-18.0124	264399		1.00885			23.9929	14.981	-9.01189	516.236		0.953865			27.4079	18.4213	-8.9866	507.268		0.720552			23.9929	32.1112	8.11824	0.00359887		1.00226			27.4079	32.9958	5.58788	0.0207913		0.949529
Cu								Cu						negativos		Cu								Cu								Cu						negativo		Cu						negativo
24.8187	8.69534	-16.1233	71384.2		1.74042			27.0698	9.44198	-17.6278	202534		0.772794	1.29401		24.8187	15.1546	-9.66409	811.297		1.49906			27.0698	13.8634	-13.2064	9452.06		13.4263			24.8187	33.6812	8.86255	0.00214835		0.598301	1.6714		27.0698	34.2337	7.16389	0.00697358		0.31848	3.13991
24.8187	8.66997	-16.1487	72650.4		1.77129			27.0698	9.41704	-17.6527	206065		0.786267	1.27183		24.8187	15.1618	-9.65681	807.213		1.49151			27.0698	13.8402	-13.2296	9605.21		13.6438			24.8187	33.0796	8.26092	0.00325999		0.907886	1.10146		27.0698	34.3091	7.23935	0.00661817		0.302249	3.30853
24.8187	8.70184	-16.1168	71063.3		1.7326			27.0698	9.42906	-17.6407	204356		0.779745	1.28247		24.8187	15.0015	-9.81717	902.119		1.66687			27.0698	14.0605	-13.0093	8244.86		11.7115			24.8187	33.4586	8.63996	0.00250676		0.698114	1.43243		27.0698	33.7016	6.63179	0.010084		0.460532	2.1714
Cr								Cr								Cr								Cr								Cr								Cr
26.3888	8.72787	-17.661	207241		5.05276			24.8333	6.32826	-18.505	372018		1.41948			26.3888	15.9579	-10.4309	1380.4		2.55061			24.8333	14.8268	-10.0065	1028.64		1.46113			26.3888	33.9755	7.58667	0.00520217		1.44877			24.8333	34.8238	9.99053	0.000982996		0.044893	22.2752
26.3888	8.68606	-17.7028	213335		5.20132			24.8333	6.58653	-18.2468	311042		1.18682			26.3888	15.5679	-10.8209	1808.87		3.34231			24.8333	14.6011	-10.2322	1202.81		1.70854			26.3888	32.9503	6.56149	0.0105875		2.94855			24.8333	34.9244	10.0911	0.000916791		0.0418695	23.8838
26.3888	8.72622	-17.6626	207478		5.05853			24.8333	6.65739	-18.1759	296132		1.12993			26.3888	15.4956	-10.8932	1901.9		3.5142			24.8333	14.5958	-10.2375	1207.2		1.71478			26.3888	33.6272	7.2384	0.00662253		1.84433			24.8333	34.1988	9.36556	0.00151595		0.0692329	14.444
Pb								Pb								Pb								Pb								Pb								Pb
24.6292	8.69196	-15.9373	62747.9		1.52986			24.1129	3.29348	-20.8194	1.85043e+06		7.06055			24.6292	15.2564	-9.37282	662.979		1.22501			24.1129	13.6908	-10.4221	1372.05		1.94894			24.6292	30.835	6.20576	0.0135481		3.77307			24.1129	34.0079	9.89498	0.0010503		0.0479668	20.8477
24.6292	8.68748	-15.9418	62943.3		1.53462			24.1129	3.32329	-20.7896	1.8126e+06		6.91617			24.6292	15.4711	-9.15817	571.327		1.05566			24.1129	13.695	-10.4179	1368.08		1.9433			24.6292	30.9995	6.37026	0.0120881		3.36646			24.1129	34.4899	10.377	0.000751988		0.034343	29.118
24.6292	8.6603	-15.9689	64140.4		1.56381			24.1129	3.38837	-20.7245	1.73265e+06		6.61111			24.6292	15.3097	-9.31958	638.958		1.18062			24.1129	13.6394	-10.4735	1421.84		2.01966			24.6292	31.5207	6.89145	0.00842302		2.34575			24.1129	33.7348	9.62192	0.00126915		0.0579617	17.2528
Trichoderma asperellum								Trichoderma asperellum								Trichoderma asperellum								Trichoderma asperellum								Trichoderma asperellum								Trichoderma asperellum
To-Control								To-control								To-Control								To-control								To-Control								To-control
22.6869	9.22317	-13.4637	11297.5	13258.4	0.852103			25.0469	17.5363	-7.5106	182.354	187.66	0.971724			22.6869	16.6583	-6.02855	65.2789	67.9463	0.960744			25.0469	18.6106	-6.43632	86.6017	96.4708	0.897698			22.6869	34.5194	11.8325	0.000274199	0.000326994	0.838544			25.0469	33.5986	8.55167	0.00266496	0.00195706	1.36171
22.6869	8.87012	-13.8168	14429.9		1.08836			25.0469	17.3537	-7.69317	206.955		1.10282			22.6869	16.5238	-6.16309	71.6597		1.05465			25.0469	18.367	-6.67989	102.529		1.0628			22.6869	33.9843	11.2974	0.000397321		1.21507			25.0469	33.9537	8.90678	0.0020835		1.0646
22.6869	8.90884	-13.7781	14047.8		1.05954			25.0469	17.6067	-7.44022	173.672		0.925459			22.6869	16.623	-6.06394	66.9002		0.984604			25.0469	18.399	-6.64791	100.281		1.0395			22.6869	34.3448	11.658	0.000309461		0.946383			25.0469	34.8457	9.79877	0.00112274		0.573684
Cu								Cu	repetición							Cu								Cu								Cu								Cu
23.1167	9.45695	-13.6598	12941.8	12698.6	0.976124	1.02446		25.444	10.6954	-14.7486	27527.3		146.687			23.1167	14.6577	-8.45904	351.905		5.17916			25.444	16.3415	-9.1025	549.7		5.6981			23.1167	31.9273	8.8106	0.00222712		6.8109			25.444	34.5756	9.13168	0.00178275		0.910932	1.09778
23.1167	9.50665	-13.6101	12503.7		0.943075	1.06036		25.444	10.2104	-15.2335	38526		205.297			23.1167	14.7178	-8.39894	337.547		4.96785			25.444	16.6651	-8.77888	439.243		4.55312			23.1167	32.4824	9.36574	0.00151577		4.63546			25.444	35.2979	9.85389	0.00108065		0.552178	1.81101
23.1167	9.48983	-13.6269	12650.3		0.954133	1.04807		25.444	10.1329	-15.3111	40652.4		216.627			23.1167	14.6264	-8.49033	359.62		5.29271			25.444	16.6071	-8.83691	457.272		4.74001			23.1167	32.3377	9.22095	0.00167578		5.1248			25.444	34.8269	9.38293	0.00149781		0.765337	1.30661
Cr								Cr	repetición							Cr								Cr								Cr								Cr
23.3602	9.18146	-14.1787	18544.5		1.39869			23.2253	9.29478	-13.9306	15614.2	11757.3	83.2043			23.3602	15.2947	-8.06544	267.88		3.94252			23.2253	14.6835	-8.54187	372.701		3.86336			23.3602	33.3638	10.0037	0.000974075		2.97888			23.2253	34.2177	10.9923	0.000490886		0.250828	3.98679
23.3602	9.36949	-13.9907	16278.4		1.22778			23.2253	9.95451	-13.2708	9883.74		52.6682			23.3602	15.2728	-8.08736	271.981		4.00289			23.2253	14.8393	-8.38608	334.55		3.46789			23.3602	33.8811	10.5209	0.000680583		2.08133			23.2253	35.1463	11.921	0.000257888		0.131773	7.58882
23.3602	9.04552	-14.3146	20376.9		1.5369			23.2253	9.97062	-13.2547	9773.99		52.0834			23.3602	15.5299	-7.83022	227.578		3.34938			23.2253	14.984	-8.24131	302.609		3.1368			23.3602	32.5923	9.23211	0.00166287		5.08533			23.2253	34.0269	10.8015	0.000560296		0.286294	3.49291
Pb								Pb	repetición							Pb								Pb								Pb								Pb
24.3623	9.39962	-14.9627	31931.7		2.40841			24.405	13.6466	-10.7584	1732.2	1615.11	9.23047			24.3623	14.2633	-10.099	1096.74		16.1412			24.405	15.9934	-8.4116	340.521		3.52979			24.3623	34.2759	9.91353	0.00103688		3.17096			24.405	35.941	11.536	0.000336752		0.17207	5.81159
24.3623	9.45446	-14.9079	30740.8		2.31859			24.405	13.6779	-10.7271	1695.01		9.03234			24.3623	14.4018	-9.96051	996.353		14.6638			24.405	15.7118	-8.69317	413.91		4.29052			24.3623	34.5589	10.1966	0.000852173		2.60608			24.405	34.3736	9.96855	0.000998085		0.509991	1.96082
24.3623	9.49465	-14.8677	29896.2		2.25489			24.405	13.9352	-10.4698	1418.14		7.55693			24.3623	14.4933	-9.86905	935.149		13.7631			24.405	15.5153	-8.88974	474.327		4.91679			24.3623	33.7773	9.41498	0.00146491		4.47992			24.405	35.3927	10.9877	0.000492458		0.251631	3.97407
