# Supplementary material for: Tolerance and antioxidant response to heavy metals are differentially activated in Trichoderma asperellum and Trichoderma longibrachiatum
Source: PeerJ. 2025 Feb 24;13:e19016. doi: 10.7717/peerj.19016 (PMC11867043; doi:10.7717/peerj.19016)
Supplement: Supplemental Information 3 [file peerj-13-19016-s003.xls]

## Sheet: Sheet1
ITEM TO CHECK	IMPORTANCE	CHECKLIST
EXPERIMENTAL DESIGN
Definition of experimental and control groups	E	Page 4; line 121-128
Number within each group	E	Page 5; line 165-166
Assay carried out by core lab or investigator's lab?	D
Acknowledgement of authors' contributions	D	Page 15; line 493-495
SAMPLE
Description	E	Page 5; line 144-146
Volume/mass of sample processed	D
Microdissection or macrodissection	E	Page 5; line 145
Processing procedure	E	Page 5;line 143-168
If frozen - how and how quickly?	E	Page 5;line 143-168
If fixed - with what, how quickly?	E	Page 5;line 143-168
Sample storage conditions and duration (especially for FFPE samples)	E	Page 5;line 147-148
NUCLEIC ACID EXTRACTION
Procedure and/or instrumentation	E	Page 5; line 144-145
Name of kit and details of any modifications	E	Page 5; line 151-153
Source of additional reagents used	D
Details of DNase or RNAse treatment	E	Page 5; line 146-147
Contamination assessment (DNA or RNA)	E	Page 5; line 146-149
Nucleic acid quantification	E	Page 5; line 148-149
Instrument and method	E	Page 5; line 148-149
Purity (A260/A280)	D
Yield	D
RNA integrity method/instrument	E	Page 5; line 149-150
RIN/RQI or Cq of 3' and 5' transcripts	E	Page 5; line 149-150
Electrophoresis traces	D
Inhibition testing (Cq dilutions, spike or other)	E	Page 5; line 152-172
REVERSE TRANSCRIPTION
Complete reaction conditions	E	Page 5; line 150-154
Amount of RNA and reaction volume	E	Page 5; line 154-155
Priming oligonucleotide (if using GSP) and concentration	E	Page 5; line 155-156
Reverse transcriptase and concentration	E	Page 5; line 157-158
Temperature and time	E	Page 5; line 156-160
Manufacturer of reagents and catalogue numbers	D
Cqs with and without RT	D*
Storage conditions of cDNA	D
qPCR TARGET INFORMATION
If multiplex, efficiency and LOD of each assay.	E	Not applicable
Sequence accession number	E	Supplemental Table 1
Location of amplicon	D
Amplicon length	E	Supplemental Table 1
In silico specificity screen (BLAST, etc)	E	Supplemental Table 1
Pseudogenes, retropseudogenes or other homologs?	D
Sequence alignment	D
Secondary structure analysis of amplicon	D
Location of each primer by exon or intron (if applicable)	E	Not applicable
What splice variants are targeted?	E	Not applicable
qPCR OLIGONUCLEOTIDES
Primer sequences	E	Page 5; line 160-167
RTPrimerDB Identification Number	D
Probe sequences	D**	Supplemental Table 1
Location and identity of any modifications	E	Not applicable
Manufacturer of oligonucleotides	D
Purification method	D
qPCR PROTOCOL
Complete reaction conditions	E	Page 5; line 156-169
Reaction volume and amount of cDNA/DNA	E	Page 5; line 152-155
Primer, (probe), Mg++ and dNTP concentrations	E	Page 5; line 155-156
Polymerase identity and concentration	E	Page 5; line 155-156
Buffer/kit identity and manufacturer	E	Page 5; line 152-153
Exact chemical constitution of the buffer	D
Additives (SYBR Green I, DMSO, etc.)	E	Page 5; line 152-153
Manufacturer of plates/tubes and catalog number	D
Complete thermocycling parameters	E	Page 5; line 156-160
Reaction setup (manual/robotic)	D
Manufacturer of qPCR instrument	E	Page 5; line 151-152
qPCR VALIDATION
Evidence of optimisation (from gradients)	D
Specificity (gel, sequence, melt, or digest)	E	Page 5; line 167-169
For SYBR Green I, Cq of the NTC	E	Page 5; line 143-171
Standard curves with slope and y-intercept	E	Page 5; line 143-171
PCR efficiency calculated from slope	E	Page 5; line 143-171
Confidence interval for PCR efficiency or standard error	D
r2 of standard curve	E	Page 5; line 143-171
Linear dynamic range	E	Page 5; line 143-171
Cq variation at lower limit	E	Page 5; line 143-171
Confidence intervals throughout range	D
Evidence for limit of detection	E	Page 5; line 143-171
If multiplex, efficiency and LOD of each assay.	E	Not applicable
DATA ANALYSIS
qPCR analysis program (source, version)	E	Page 5; line 152
Cq method determination	E	Page 5; line 152
Outlier identification and disposition	E	Page 5; line 152
Results of NTCs	E	Page 5; line 152
Justification of number and choice of reference genes	E	Page 5; line 143-171
Description of normalisation method	E	Page 5; line 169-170
Number and concordance of biological replicates	D
Number and stage (RT or qPCR) of technical replicates	E	Page 5; line 170-171
Repeatability (intra-assay variation)	E	Page 5; line 170-171
Reproducibility (inter-assay variation, %CV)	D
Power analysis	D
Statistical methods for result significance	E	Page 6; line 195-197
Software (source, version)	E	Page 6; line 196
Cq or raw data submission using RDML	D
Table 1. MIQE checklist for authors, reviewers and editors. All essential information (E) must be submitted with the manuscript. Desirable
information (D) should be submitted if available. If using primers obtained from RTPrimerDB, information on qPCR target, oligonucleotides,
protocols and validation is available from that source.
*: Assessing the absence of DNA using a no RT assay is essential when first extracting RNA. Once the sample has been validated as
RDNA-free, inclusion of a no-RT control is desirable, but no longer essential.
**: Disclosure of the probe sequence is highly desirable and strongly encouraged. However, since not all commercial pre-designed assay
vendors provide this information, it cannot be an essential requirement. Use of such assays is advised against.
